# Supplementary material
Source: PubMed Central journal article supplement (PMC1134789)
Supplement: bj3860255add.pdf [file bj3860255add.pdf]

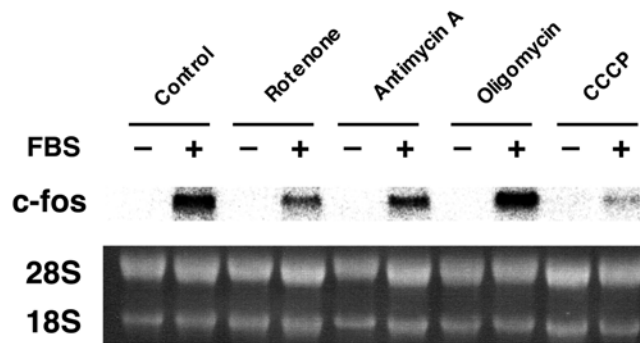

**Supplementary Figure 1 Effects of mitochondrial inhibitors on c-fos induction by FBS**

Growth-arrested Ar7r5 cells were incubated with 500 nM rotenone, 100 ng/ml antimycin A, 2 µg/ml oligomycin or 10 µM CCCP for 24 h, and then unstimulated or stimulated with 10% FBS for 30 min.

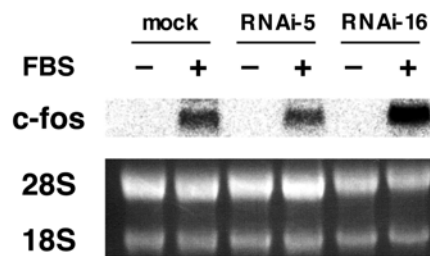

**Supplementary Figure 2 Induction of c-fos in ATF-1 RNAi clones**

Growth-arrested cells were unstimulated or stimulated with 10% FBS for 30 min.
